# Supplementary material
Source: PubMed Central journal article supplement (PMC7430499)
Supplement: NIHMS1600882-supplement-mmc2.pdf [file NIHMS1600882-supplement-mmc2.pdf]

Table 1.

| Reference               | Program                 | Intervention (Dosage)                                                                                                                                              | Comparison Groups<br>(Diagnosis, Sample Size, Mean Age (SD) years, Percent Male)                                                          | Main Findings                                                                                                                                                                                                                                                                        | Effect Size<br>(Significant Group x Time)                                                                                                                                                                                                                                          |
|-------------------------|-------------------------|--------------------------------------------------------------------------------------------------------------------------------------------------------------------|-------------------------------------------------------------------------------------------------------------------------------------------|--------------------------------------------------------------------------------------------------------------------------------------------------------------------------------------------------------------------------------------------------------------------------------------|------------------------------------------------------------------------------------------------------------------------------------------------------------------------------------------------------------------------------------------------------------------------------------|
| (Laugeson et al., 2011) | Traditional PEERS®      | GSSI: Parent-assisted, in-person social skills group with 14 weekly sessions (90 min each)                                                                         | Treatment (ASD, N=14, 15.0 (1.0), 85.7%M) vs. DTC (ASD, N=14, 14.3 (1.4), 78.6%M)                                                         | PEERS group showed significant improvement on social skills (pSSRS), social responsiveness (pSRS), number of get-togethers; gains maintained at 14-week follow up                                                                                                                    | Between Groups: pSSRP Social Skills Scale (d=0.6969*); pSRS (d=0.6525*); QPQ-P/A: (d=0.6094*)                                                                                                                                                                                      |
| (Schohl et al., 2013)   | PEERS® Replication      | GSSI: Parent-assisted, in-person social skills groups with 14 weekly sessions (90 min each)                                                                        | Treatment (ASD, N=29, 14.00 (1.28), 82.8%M) vs. DTC (ASD, N=29, 13.31 (1.65), 89.7%M)                                                     | PEERS group showed significant improvement on social anxiety, core autistic symptoms, problem behaviors, PEERS concepts and friendship skills                                                                                                                                        | Between Groups: Combined adolescent and parent outcome variables (d=0.9663*)                                                                                                                                                                                                       |
| (Matthews et al., 2018) | PEERS® with Peers (PwP) | GSSI: Peer-mediated PEERS vs. Traditional PEERS vs. Delayed Treatment Control (DTC) in community setting with additional 4-month follow up                         | Traditional PEERS (ASD, N=10, 15.10 (1.29), 80.0%M) vs. PwP (ASD, N=12, 15.17 (1.27), 83.33%M) vs. DTC (ASD, N=12, 15.42 (1.08), 83.33%M) | Significant effect of study group on pSRS Total T-scores, SSIS Social Skills, Problem Behavior subscale scores, TASSK scores, SIAS scores, R-UCLA scores, QSQ-P/A; PwP group showed modest advantage in social skills knowledge and social functioning relative to Traditional PEERS | T1-T2: Groups (PEERS, PwP, DTC): Social Cognition Measures ( $\eta_p^2=0.50^*$ ); QSQ-P/A ( $\eta_p^2=0.22^*$ ); PwP vs. DTC: pSSIS Social Skills (d=1.48*); pSSIS Problem Behaviors: (d=1.08*)<br>T1-T3: Groups (PEERS, PwP, DTC) Social Cognition Measures ( $\eta_p^2=0.44^*$ ) |
| (Rabin et al., 2018)    | PEERS® Hebrew Version   | GSSI: Hebrew translation/adaptation of traditional PEERS with cross-cultural validation and 4-month follow up                                                      | Treatment (ASD, N=20, 14.03 (1.83), 95.0%M) vs. DTC (ASD, N=21, 13.95 (1.72), 95.24%M)                                                    | PEERS group showed significant improvement on social-skills, number of social encounters, self-confidence and responsibility, and ASD symptoms compared to DTC; most adolescent gains maintained at follow up                                                                        | T1-T2: Between Groups: CASS scores ( $\eta^2=0.45^*$ ); Combined adolescent measures ( $\eta^2=0.67^*$ ); Combined teacher measures ( $\eta^2=0.86^*$ )                                                                                                                            |
| (Shum et al., 2018)     | PEERS® Chinese Version  | GSSI: Chinese translation/adaptation of traditional PEERS with cross-cultural validation                                                                           | Treatment (ASD, N=33, 13.42 (0.94), 84.85%M) vs. DTC (ASD, N=22, 13.55 (1.00), 72.73%M)                                                   | PEERS group showed significant improvements in social skills knowledge and social functioning with medium to large effect sizes                                                                                                                                                      | T1-T2: Between Groups: pSRS scores ( $\eta_p^2=0.13^*$ ); TASSK scores ( $\eta_p^2=0.36^*$ )                                                                                                                                                                                       |
| (Yoo et al., 2014)      | PEERS® Korean Version   | GSSI: Korean translation/adaptation of traditional PEERS with cross-cultural validation                                                                            | Treatment (ASD, N=23, 14.04 (1.64), 91.3%M) vs. DTC (ASD, N=24, 13.54 (1.50), 95.8%M)                                                     | PEERS group showed significant improvements in social skills knowledge, interpersonal skills, and play/leisure skills, as well as a decrease in depressive symptoms and ASD symptoms                                                                                                 | T1-T2: Between Groups: ADOS Social Interaction (d=1.03*); ADOS Language and Communication (d=0.85*); EHWA-VABS: Interpersonal (d=1.07*); TASSK-R (d=1.18*)                                                                                                                         |
| (White et al., 2012)    | MASSI                   | GSSI: Manual-based, modular therapy, 13 sessions of individual therapy+parent coaching (60 min each) and 7 sessions of group therapy/skills practice (75 min each) | Treatment (ASD+Anx, N=15, 14.0, 73%M) vs. Wait-list Control (ASD+Anx, N=15, 15.0, 80%M)                                                   | MASSI group showed significant improvement on pSRS total score and superiority to wait-list. PARS and CASI-Anx did not significantly change within and between groups.                                                                                                               | Between Groups: pSRS (d=1.03*); CASI-Anx (d=0.30); PARS: (d=0.32)                                                                                                                                                                                                                  |
| (Irer et al., 2019)     | MASSI-Kenya             | GSSI: school-based MASSI + 20 additional sessions focused on skills practice                                                                                       | Treatment (ASD, N=20, 70%M) vs. TAU (ASD, N=20, 65%M); Only reported Ns for age groups (Age Range: 5-21yrs)                               | MASSI group showed significantly reduced ASD social impairment severity and anxiety and superiority to control on both outcomes.                                                                                                                                                     | Between Groups: CASI ( $\eta^2=0.067^+$ ); pSRS-2: $\eta^2=0.093^+$ )                                                                                                                                                                                                              |

|                              |                                            |                                                                                                                                                                                                                               |                                                                                                                |                                                                                                                                                                                                         |                                                                                                                                      |
|------------------------------|--------------------------------------------|-------------------------------------------------------------------------------------------------------------------------------------------------------------------------------------------------------------------------------|----------------------------------------------------------------------------------------------------------------|---------------------------------------------------------------------------------------------------------------------------------------------------------------------------------------------------------|--------------------------------------------------------------------------------------------------------------------------------------|
| (Freitag et al., 2016)       | SOSTA-FRA                                  | GSSI: Manualized, group-based, CBT social skills program delivered in group format over 12 sessions (90 min each) and 3 parent-training sessions. Includes computer-based teaching methods.                                   | Treatment (ASD, N=101, 12.7 (2.5), 95.2%M) vs. TAU (ASD, N=108, 12.9 (2.6), 92.6%M)                            | SOSTA-FRA group showed significant improvement on pSRS total score and superiority to treatment as usual. Effects maintained at 3-month follow-up. Higher IQ associated with greater reduction in pSRS. | Between Groups: pSRS: ( $\eta_p^2=0.35^*$ )                                                                                          |
| (Choque-Olsson et al., 2017) | SSGT (KONTAKT)                             | GSSI: Manualized, group-based, CBT social skills program delivered in group format over 12 weekly sessions (60 min each for children; 90 min each for adolescents)                                                            | Treatment + Standard Care (ASD, N=150, 12.05 (2.61), 71% M) vs. Standard Care (ASD, N=146, 11.59 (2.66), 69%M) | pSRS total scores decreased for both groups with no between-group difference at post-treatment and 3-month follow-up. Larger change observed in SSGT for adolescents and females.                       | Between Groups: pSRS: ( $\eta_p^2=0.13^+$ ) at post-treatment; pSRS: ( $\eta_p^2=0.16^+$ ) at 3-month follow-up                      |
| (Jonsson et al., 2018)       | SSGT (KONTAKT)                             | GSSI: Extended version of SSGT involving 24 weekly sessions (60 min each for children, 90 min each for adolescents)                                                                                                           | Treatment + Standard Care (ASD, N=23, 13.04 (2.58), 78% M) vs. Standard Care (ASD, N=27, 12.63 (2.83), 63%M)   | SSGT group showed significantly larger reduction in pSRS-2 total scores at post-treatment and 3-month follow-up.                                                                                        | Between Groups: pSRS-2 ( $\eta_p^2=0.76^*$ ) at post-treatment, ( $\eta_p^2=0.82^*$ ) at 3-month follow-up                           |
| (DaWalt et al., 2017)        | Transitioning Together                     | GSSI: Manualized, multi-family group psychoeducation: 2 individual family joining sessions (60 min each), 8 weekly parent and teen group sessions (90 min each)                                                               | Treatment (ASD, N=16, 15.56 (0.73), 81%M) vs. Wait-list Control (ASD, N=25, 15.36 (1.19), 76%M)                | Treatment group showed significant increase in social interactions                                                                                                                                      | Between Groups: Frequency of Social Interactions ( $d=0.7368^+$ )                                                                    |
| (Vernon et al., 2017)        | START                                      | Experiential-Based: Immersive socialization intervention with 20 weekly sessions (90 min each)                                                                                                                                | Treatment (ASD, N=16, 13.25 (1.48), 75%M) vs. Wait-list Control (ASD, N=19, 13.64 (1.47), 63.6%M)              | Group $\times$ Time differences between START and wait-list groups on pSRS-2 and pSMCS; post-intervention pSSIS scores after adjusting for pre-intervention pSSIS scores                                | Between Groups: pSRS-2 ( $\eta_p^2=0.189^+$ ); pSMCS ( $\eta_p^2=0.28^*$ ); post-intervention adolescent SSIS ( $\eta_p^2=0.207^+$ ) |
| (Strickland et al., 2013)    | JobTIPS                                    | Experiential-Based: Internet accessed transition to employment training program with ToM-based guidance, video models, visual supports, and virtual reality practice sessions (1 week); Pre-Post-Training mock job interviews | Treatment (ASD, N= 11, 18.21 (1.03), 100%M) vs. Non-treatment Control (ASD, N=11, 17.66 (1.27), 100%M)         | JobTIPS group demonstrated significantly more effective verbal content skills than those control group                                                                                                  | Between Groups: Content Scale ( $\eta^2=0.47^*$ )                                                                                    |
| (Hochhausler et al., 2017)   | CONTACT                                    | Experiential-Based: 6 weekly (60 min each) sessions (participant pairs w/ moderator) using computer application with video modeling and self-modeling to improve conflict negotiation skills                                  | Treatment (ASD, N= 36, 15.5 (1.53), 88.9%M) vs. Non-treatment Control (ASD, N=25, 16.7 (1.53), 92.0%M)         | CONTACT group showed significant improvements on conflict resolution measures                                                                                                                           | Between Groups: ConflicTalk: Problem-Focus ( $\eta_p^2=0.14^+$ ); FFNS Total Score ( $\eta_p^2=0.15^+$ )                             |
| (Olivar-Parra et al., 2011)  | Referential Communication Training Program | Experiential-Based: 4 weekly training sessions (30-45 min each) including modeling with and without exchanging roles, creating a social cognitive conflict, and giving visual and verbal feedback                             | Treatment (ASD, N= 10, 15.4 (4.55), 80.0%M) vs. Non-treatment Control (ASD, N=10, 13.11 (3.73), 60.0%M)        | Treatment group improved significantly on message complexity post-training but gains not maintained at 3-week follow-up.                                                                                | Between Groups: Message Complexity ( $d=1.14^*$ )                                                                                    |

|                          |                 |                                                                                                                                                                                                                                  |                                                                                                                                                                                     |                                                                                                                                                                                                  |                                                                                                 |
|--------------------------|-----------------|----------------------------------------------------------------------------------------------------------------------------------------------------------------------------------------------------------------------------------|-------------------------------------------------------------------------------------------------------------------------------------------------------------------------------------|--------------------------------------------------------------------------------------------------------------------------------------------------------------------------------------------------|-------------------------------------------------------------------------------------------------|
| (Silver and Oakes, 2001) | Emotion Trainer | Computer-Assisted: Multimedia computer program designed to teach users to better recognize and predict emotions in others, 10 sessions (30 min each) over 2 weeks in school setting                                              | Experimental (ASD, N= 11, 13.9 (0.92)) vs. Lessons as Usual Controls (ASD, N=11, 14.75 (2.0)); gender not reported - participating children paired by age, gender, and school class | Experimental group improved relative to control group on Emotion Recognition Cartoons and Strange Stories, gains correlated significantly with the number of times the computer program was used | Between Groups: Emotion Recognition Cartoons ( $d=0.9327^*$ ); Strange Stories ( $d=1.1185^*$ ) |
| (Fage et al., 2018)      | School+         | Computer-Assisted: Assistive applications for use in mainstream classrooms and remediation applications to be used at home (15 min per day/ 5X a week); + weekly (3 months) class session (60 min each) with school aide support | Tablet-ASD (ASD, N=14, 14.26 (0.26), 100%M), Tablet-ID (ID, N=19, 14.23 (0.29), 47.4%M), Control-ASD (N=15, 14.16 (0.43) 86.7%M)                                                    | Two equipped groups exhibited significant improvements across time, with greater statistical effect for tablet-ASD compared with tablet-ID                                                       | Socio-Cognitive Functioning: Tablet-ASD ( $\eta^2=0.704^*$ ), Tablet-ID ( $\eta^2=0.369^*$ )    |

\* *Large Effect Size*:  $d > 0.8$ ;  $\eta^2 > 0.14$ ;  $\eta_p^2 > 0.25$

+ *Medium Effect Size*:  $d > 0.5$ ;  $\eta^2 > 0.06$ ;  $\eta_p^2 > 0.09$

ADOS: Autism Diagnostic Observation Schedule; CASI: Childhood Anxiety Sensitivity Index; CASI-Anx: CASI-Anxiety; CASS: Contextual Assessment of Social Skills; DTC: Delayed Treatment Control; EHWA-VABS: Korean Version of the Vineland Adaptive Behavior Scale -Second Edition; FFNS: Five Factor Negotiation Scale; GSSI: Group Social Skills Intervention; MASSI: Multimodal Anxiety and Social Skills Intervention; (p)SMCS: (Parent-Rated) Social Motivation and Competencies Scale; (p)SRS(-2): (Parent-Rated) Social Responsiveness Scale (2nd Edition); (p)SSRS: (Parent-Rated) Social Skills Improvement System; PARS: Pediatric Anxiety Rating Scale; PEERS® : Program for the Education and Enrichment of Relational Skills; QSQ-P/A: Quality of Socialization Questionnaire-Parent/Adolescent; R-UCLA: Revised UCLA Loneliness Scale; SIAS: Social Interaction Anxiety Scale; SOSTA-Fra: Social Skills Training Autism-Frankfurt; SSGT: Social Skills Group Training; TASSK(-R): Test of Adolescent Social Skills (Revised); TAU: Treatment As Usual
